# Supplementary material for: Interplay of Interlocus Gene Conversion and Crossover in Segmental Duplications Under a Neutral Scenario
Source: PubMed Central journal article supplement (PMC4132178; doi:10.1534/g3.114.012435), 2014-06-06
Supplement: supp_g3.114.012435_FigureS1.pdf [file supp_g3.114.012435_FigureS1.pdf]

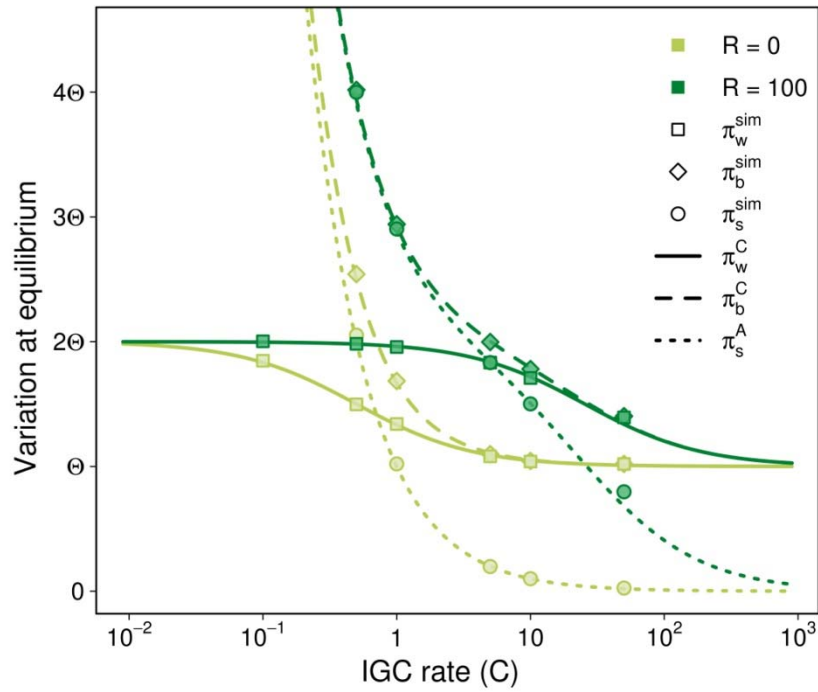

**Figure S1 Comparison of main measures of variation.** Theoretical expectations for variation within copies ( $\pi_w^C$ ) (Innan 2003), variation between copies on different chromosomes ( $\pi_b^C$ ) (Innan 2009), and variation between copies on the same chromosome ( $\pi_s^A$ ) (Ohta 1983) are shown together with their corresponding values obtained by simulation ( $\pi_w^{sim}$ ,  $\pi_b^{sim}$ , and  $\pi_s^{sim}$ ). For high IGC rates,  $\pi_w^C$  and  $\pi_b^C$  converge to  $\Theta$ , while  $\pi_s^A$  converges to 0 because high IGC homogenizes blocks on the same chromosome, but neutral variability found within populations is still present between different chromosomes. For low gene conversion values,  $\pi_s^A$  and  $\pi_b^C$  become identical and increase as IGC rate decreases, while  $\pi_w^C \rightarrow 2\Theta$ .
