# Supplementary material for: Interplay of Interlocus Gene Conversion and Crossover in Segmental Duplications Under a Neutral Scenario
Source: PubMed Central journal article supplement (PMC4132178; doi:10.1534/g3.114.012435), 2014-06-06
Supplement: supp_g3.114.012435_FigureS3.pdf [file supp_g3.114.012435_FigureS3.pdf]

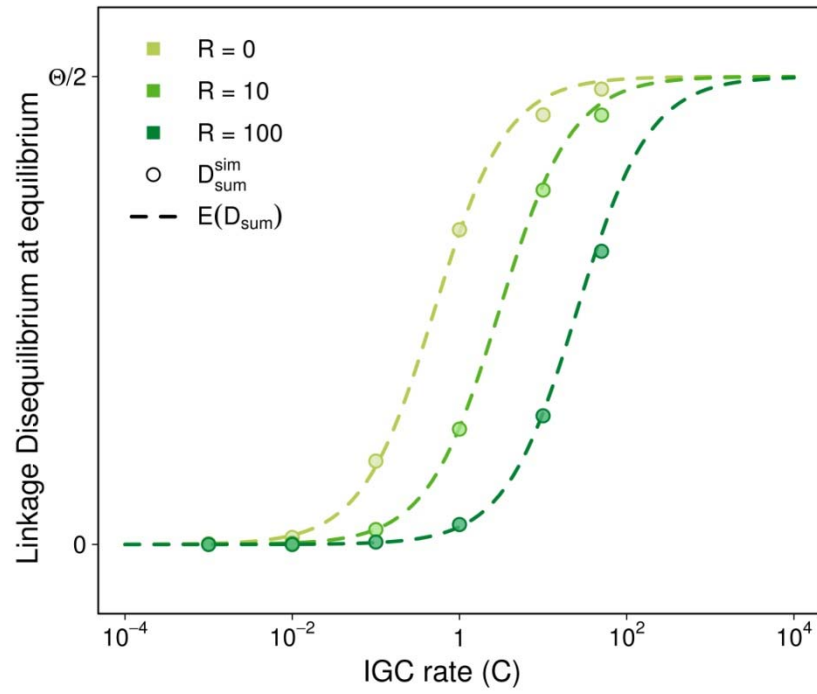

**Figure S3 LD between duplicates.** The theoretical expectations for LD between duplicates by Innan 2002 ( $E(D_{sum})$ ) are shown together with the corresponding simulation values ( $D_{sum}^{sim}$ ) for different IGC and crossover rates. LD between segmental duplications increases with IGC and decreases with crossover.
