# Supplementary material for: Interplay of Interlocus Gene Conversion and Crossover in Segmental Duplications Under a Neutral Scenario
Source: PubMed Central journal article supplement (PMC4132178; doi:10.1534/g3.114.012435), 2014-06-06
Supplement: supp_g3.114.012435_FigureS4.pdf [file supp_g3.114.012435_FigureS4.pdf]

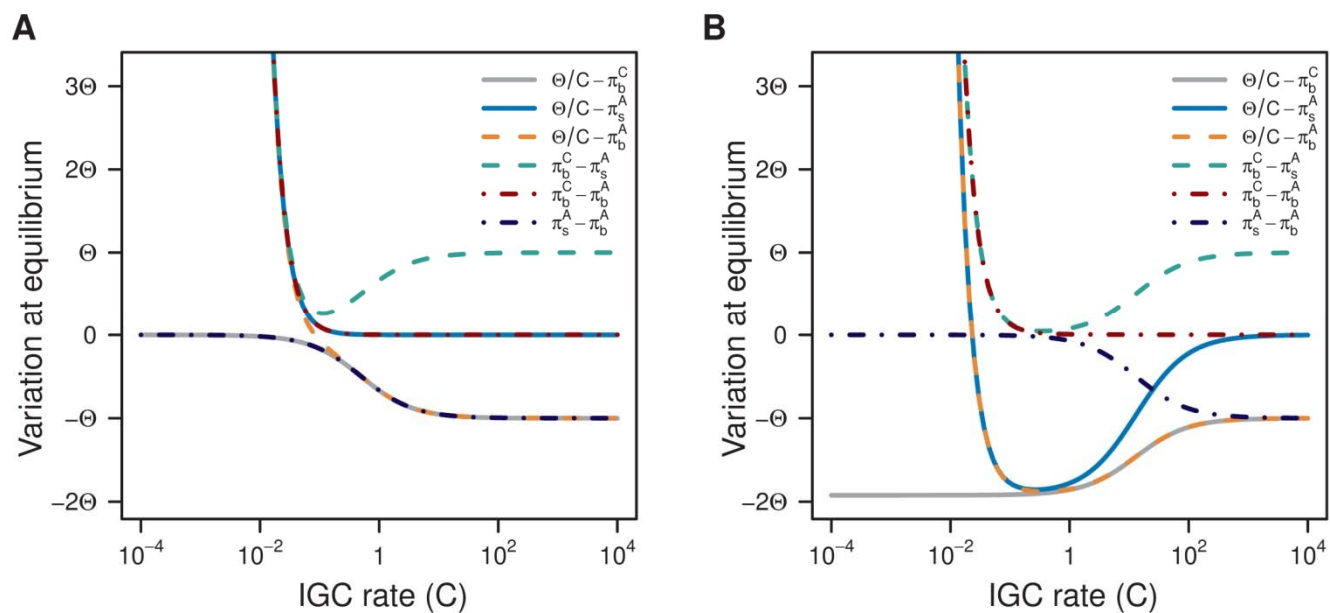

**Figure S4 Comparison between different theoretical expectations of variation between duplicates.** Figures show expectations for (A)  $R = 0$  and (B)  $R = 50$ . Notice that  $\Theta/C - \pi_b^C = \pi_s^A - \pi_b^A$  only for  $R = 0$ . For  $R > 0$ ,  $\Theta/C - \pi_b^C$  decreases with decreasing  $C$  as opposed to increasing constantly when  $R = 0$ .  $\pi_s^A - \pi_b^A$ , on the other hand, is independent of  $R$ .
