# Supplementary material for: Interplay of Interlocus Gene Conversion and Crossover in Segmental Duplications Under a Neutral Scenario
Source: PubMed Central journal article supplement (PMC4132178; doi:10.1534/g3.114.012435), 2014-06-06
Supplement: supp_g3.114.012435_FigureS5.pdf [file supp_g3.114.012435_FigureS5.pdf]

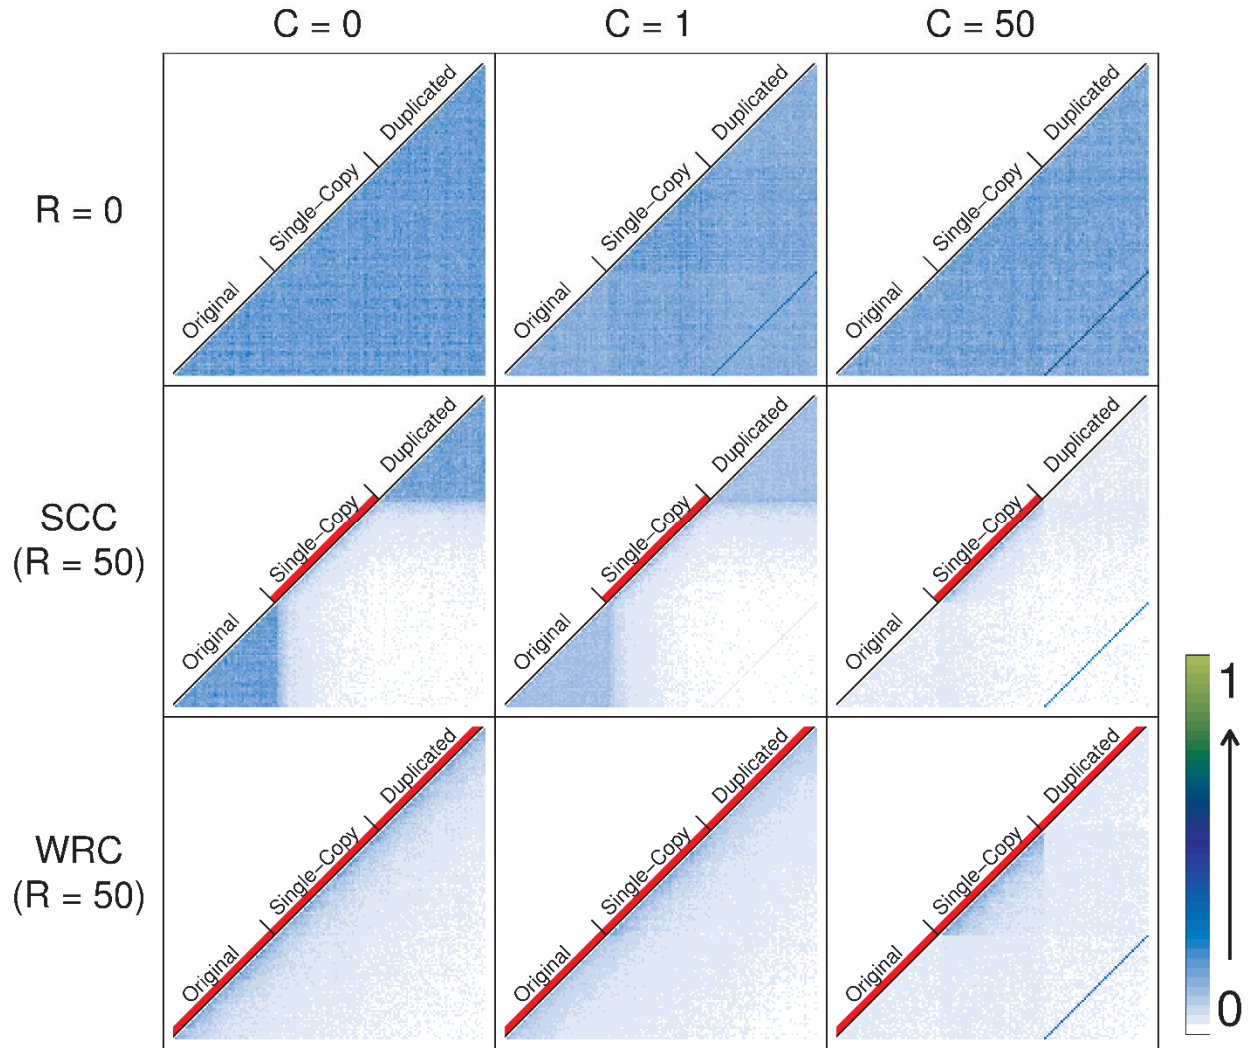

**Figure S5 LD along the sequence under different crossover models.** Here we use  $r^2$  as a measure of LD. No significant differences can be observed when comparing with  $D'$  in Figure 4.
