# Supplementary material for: Interplay of Interlocus Gene Conversion and Crossover in Segmental Duplications Under a Neutral Scenario
Source: PubMed Central journal article supplement (PMC4132178; doi:10.1534/g3.114.012435), 2014-06-06
Supplement: supp_g3.114.012435_FigureS7.pdf [file supp_g3.114.012435_FigureS7.pdf]

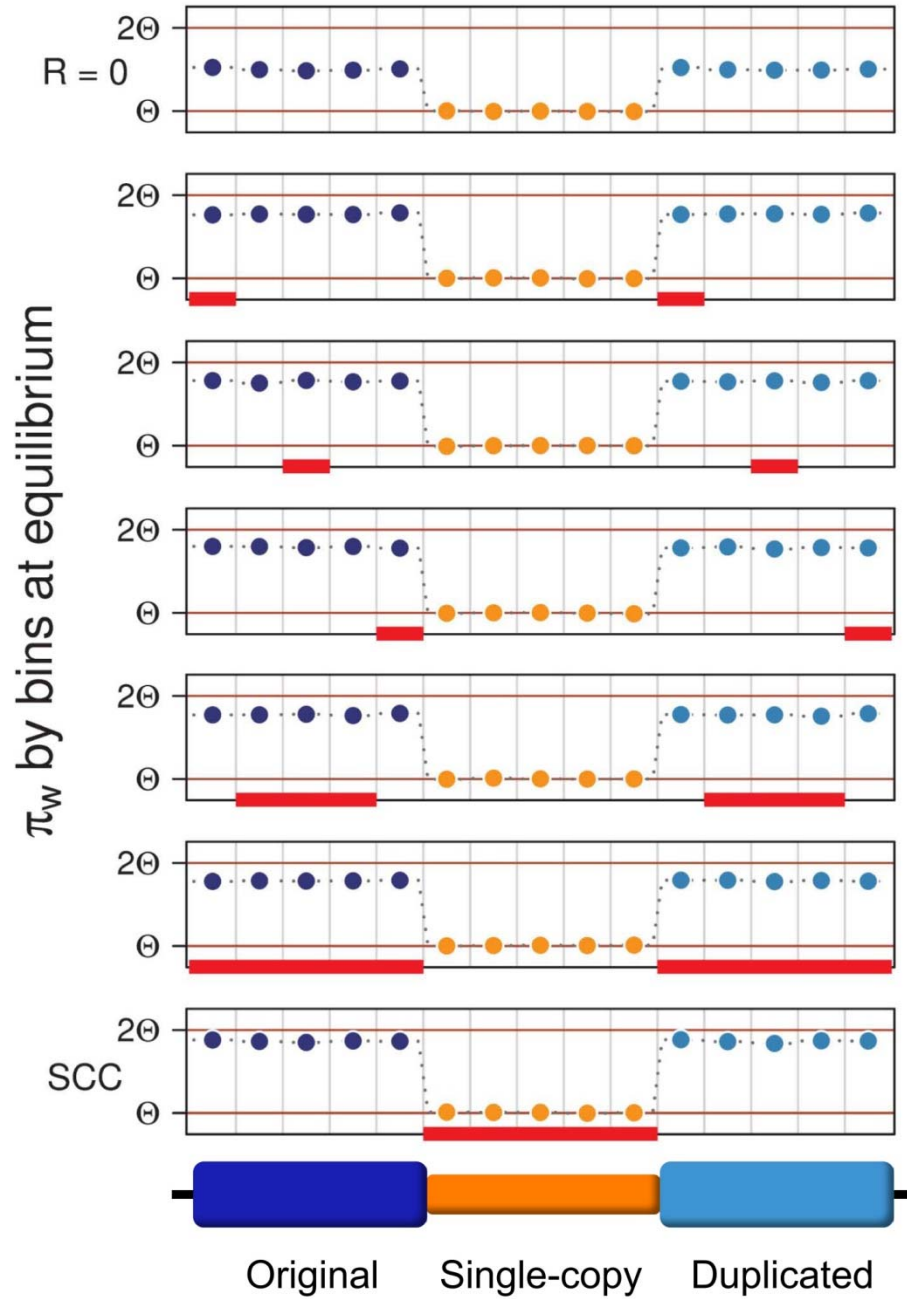

**Figure S7** Distribution of variation along the simulated sequence under different two-hotspot HSC cases. The presence of two hotspots in paralogous regions on duplicate blocks homogenizes the amount of variation within all the bins of the duplicated blocks in all cases.
