# Supplementary material for: Interplay of Interlocus Gene Conversion and Crossover in Segmental Duplications Under a Neutral Scenario
Source: PubMed Central journal article supplement (PMC4132178; doi:10.1534/g3.114.012435), 2014-06-06
Supplement: supp_g3.114.012435_FileS4.pdf [file supp_g3.114.012435_FileS4.pdf]

## File S4

### Validation on linkage disequilibrium

Innan (2002) also derived the expectation of LD between two loci:

$$E(D) = \frac{c}{\beta} \left(1 - \frac{2\lambda}{\omega}\right). \quad (8)$$

To generalize his theory to genes of length  $L$  (Innan 2003) he defined  $D_{sum}$  as the sum of LD at all  $L$  sites:

$$D_{sum} = \sum_{m=1}^L D_m, \quad (9)$$

where  $D_m$  is LD at site  $m$  (i.e.  $D_m = \frac{n_{AA}n_{aa} - n_{Aa}n_{aA}}{n(n-1)}$ , where  $n_{xy}$  represents the number of chromosomes with nucleotides  $x$  and  $y$  at original and duplicated genes, respectively). His expectation for  $D_{sum}$  for an infinite-site model (Innan 2003) is:

$$E(D_{sum}) = \frac{2\theta C}{4C + R + 2}, \quad (10)$$

which is equivalent to  $E(D)$ .

Figure S3 shows the results for  $D_{sum}$  from our simulations compared to  $E(D_{sum})$ . Our simulations show that  $E(D_{sum})$  is not an accurate predictor for LD measures for high IGC rates when  $R > 0$  since  $D_{sum}$  reaches a plateau before reaching  $\Theta/2$ . This plateau is lower for higher crossover rates.

$D_{sum}$  is a measure of LD between duplicate regions. To gain a deeper understanding of the pattern of LD not only between but within duplicates and in the whole region, we have calculated LD along the entire simulated region (see Methods).
