# Supplementary material for: Interplay of Interlocus Gene Conversion and Crossover in Segmental Duplications Under a Neutral Scenario
Source: PubMed Central journal article supplement (PMC4132178; doi:10.1534/g3.114.012435), 2014-06-06
Supplement: supp_g3.114.012435_FileS5.pdf [file supp_g3.114.012435_FileS5.pdf]

File S5

**Comparison between theoretical expectations of variation between duplicates**

In this note, we analyze  $\pi_b^C$ ,  $\pi_b^A$  and  $\pi_s^A$ . Recall that  $\pi_s^A$  corresponds to the average variation between duplicated blocks on the same chromosome while  $\pi_b^A$  is the average variation between different blocks on different chromosomes. This difference is reflected in their behavior for high IGC rates. As shown in Figure S4,  $\pi_s^A \rightarrow 0$  while  $\pi_b^A \rightarrow \Theta$  for high IGC rates. Of course, very high IGC rates will imply complete identity between duplicated blocks on the same chromosome while there is a minimum equilibrium divergence for blocks on different chromosomes in accordance with the neutral theory of molecular evolution.

For high IGC rates ( $c \gg \mu$ ) and very small crossover rates,

$$\pi_s^A(r \approx 0, c \gg \mu) = 1 - \hat{c}_1 \approx 1 - \frac{c}{c+\mu} = \frac{\mu}{c+\mu} \approx \frac{\mu}{c}. \quad (11)$$

For smaller conversion rates  $\pi_b^A \approx \pi_s^A$ , however, they diverge from  $\pi_b^C$ , as shown in Figure S4A. Interestingly, when  $R = 0$ , and contrary to what happens for high conversion rates,  $\pi_s^A \neq \Theta/C$ , but  $\pi_b^C = \Theta/C$ , since  $C \ll 1$  (then,  $C^2 \ll C$ ) and therefore,

$$\pi_b^C(R = 0, C \ll 1) = \frac{\Theta(4C^2 + 4C + 2)}{C(4C + 2)} \approx \frac{\Theta(4C + 2)}{C(4C + 2)} = \frac{\Theta}{C} = \frac{\mu}{c}. \quad (12)$$

Additionally, we find that for  $R = 0$ , and for all values of  $C$ :

$$\frac{\Theta}{c} - \pi_b^C \approx \pi_s^A - \pi_b^A. \quad (13)$$

However, this is not the case for  $R > 0$  as can be appreciated by comparing Figures S4A and S4B.
